# Supplementary material for: Efficient solid-state emission and reversible mechanofluorochromism of a tetraphenylethene-pyrene-based β-diketonate boron complex
Source: Royal Society of Chemistry journal article supplement (doi:10.1039/c9ra03847g), 2019-01-01
Supplement: c9ra03847g1.pdf [file c9ra03847g1.pdf]

# **Efficient solid-state emission and reversible mechanofluorochromism of tetraphenylethene-pyrene-based $\beta$ -diketonate boron complex**

Ting Sun <sup>a</sup>, Feng Zhao <sup>a, b, \*</sup>, Gaolei Xi <sup>c</sup>, Mengyu Sun <sup>a</sup>, Jian Gong <sup>a</sup>, Chang Dong <sup>a</sup>,  
Jingyi Qiu <sup>a</sup>

<sup>a</sup> *College of Chemistry and Chemical Engineering, Anyang Normal University, Anyang 455000, P. R. China*

<sup>b</sup> *Henan Province Key Laboratory of New Opto-Electronic Functional Materials, Anyang 455000, P. R. China*

<sup>c</sup> *Technology Ceter, China Tobacco Henan Industrial Co., Ltd., Zhengzhou 45000, P.R. China*

*\* Corresponding author. E-mail addresses: zhaofeng@aynu.edu.cn*

## Table of Contents

**Table S1.** Photophysical data of **BF<sub>2</sub>-TP** in different solvents.

**Table S2.** Solid-state fluorescence lifetime data of **BF<sub>2</sub>-TP** samples in as-prepared and grinding state.

**Fig. S1** Maximum fluorescent emission of **BF<sub>2</sub>-TP** upon repeating treatment by grinding and fuming with DCM vapor.

**Fig. S2** Fluorescence decay profiles of as-prepared (a) and grinding (b) **BF<sub>2</sub>-TP**,  $\lambda_{\text{ex}} = 370$  nm.

**Fig. S3** <sup>1</sup>H NMR (400 MHz) spectrum of compound **6**.

**Fig. S4** <sup>13</sup>C NMR (100 MHz) spectrum of compound **6**.

**Fig. S5** TOF LC/MS spectrum of compound **6**.

**Fig. S6** <sup>1</sup>H NMR (400 MHz) spectrum of compound **BF<sub>2</sub>-TP**.

**Fig. S7** <sup>1</sup>H NMR (400 MHz) spectrum (larger version) of compound **BF<sub>2</sub>-TP**.

**Fig. S8** <sup>13</sup>C NMR (100 MHz) spectrum of compound **BF<sub>2</sub>-TP**.

**Fig. S9** MALDI/TOF MS spectrum of compound **BF<sub>2</sub>-TP**.

**Table S1.** Photophysical data of **BF<sub>2</sub>-TP** in different solvents.

| solvent     | $\lambda_{\text{abs}}/\text{nm}$ ( $\epsilon/\text{mol}^{-1} \text{cm}^{-1}$ ) | $\lambda_{\text{em}}/\text{nm}$ | $\Delta\nu_{\text{st}}^a/\text{cm}^{-1}$ | $\Phi_{\text{f}}^b$ |
|-------------|--------------------------------------------------------------------------------|---------------------------------|------------------------------------------|---------------------|
| hexane      | 324 (25800), 340 (28000), 411 (22000), 438 (19400)                             | 507                             | 4548                                     | 0.369               |
| cyclohexane | 325 (35600), 341 (39000), 414 (29500), 442 (25600)                             | 511                             | 4585                                     | 0.354               |
| toluene     | 327 (35600), 342 (36100), 420 (25200)                                          | 543                             | 5393                                     | 0.208               |
| THF         | 326 (32100), 341 (35800), 419(26000)                                           | 576                             | 6448                                     | 0.196               |
| DCM         | 327 (32300), 342 (34700), 424 (24200), 461 (24700)                             | 609                             | 7276                                     | 0.190               |
| DMF         | 327 (32500), 342 (37300), 423 (25700), 465 (22600)                             | 631                             | 7793                                     | 0.095               |
| DMSO        | 331 (32900), 344 (32300), 429 (25300), 456 (25800)                             | 645                             | 7806                                     | 0.083               |

<sup>a</sup> $\Delta\nu_{\text{st}} = \nu_{\text{abs}} - \nu_{\text{em}}$ . <sup>b</sup>The fluorescence quantum yield ( $\Phi_{\text{f}}$ ) was measured using fluorescein ( $\Phi = 0.79$  in 0.1 M sodium hydroxide water solution) as standard.

**Table S2.** Solid-state fluorescence lifetime data of **BF<sub>2</sub>-TP** samples in as-prepared and grinding state

|                               | as-prepared        | grinding           |
|-------------------------------|--------------------|--------------------|
| $\tau_1^a$ (ns)               | 3.03               | 3.18               |
| $\tau_2^a$ (ns)               | 9.59               | 9.57               |
| $A_1^b$ (%)                   | 91.12              | 31.28              |
| $A_2^b$ (%)                   | 8.88               | 68.72              |
| $\tau_f^c$ (ns)               | 3.61               | 7.57               |
| $\Phi_f^d$ (%)                | 45.90              | 34.88              |
| $k_f^e$ (s <sup>-1</sup> )    | $1.27 \times 10^8$ | $4.61 \times 10^7$ |
| $k_{nr}^f$ (s <sup>-1</sup> ) | $1.50 \times 10^8$ | $8.60 \times 10^7$ |

<sup>a</sup> Fluorescence lifetime. <sup>b</sup> Fractional contribution. <sup>c</sup> Weighted mean lifetime.

<sup>d</sup> The fluorescence quantum yield,  $\lambda_{ex} = 370$  nm. <sup>e</sup> Radiative ( $k_f = \Phi_f/\tau_f$ ).

<sup>f</sup> Nonradiative rate constants ( $k_{nr} = (1-\Phi_f)/\tau_f$ ).

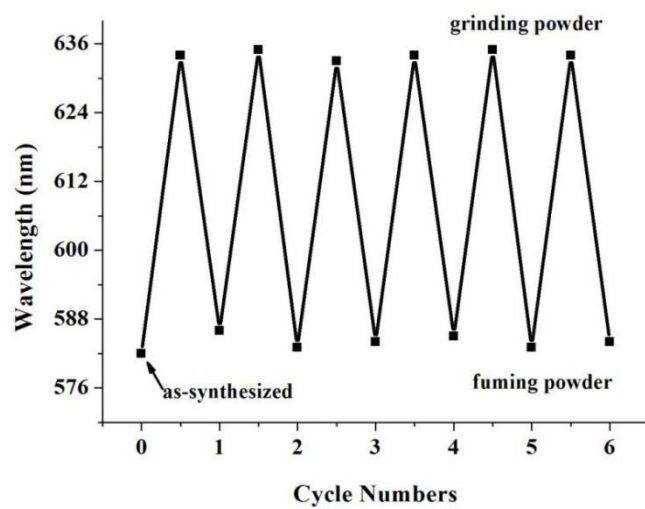

**Fig. S1** Maximum fluorescent emission of  $\text{BF}_2\text{-TP}$  upon repeating treatment by grinding and fuming with DCM vapor.

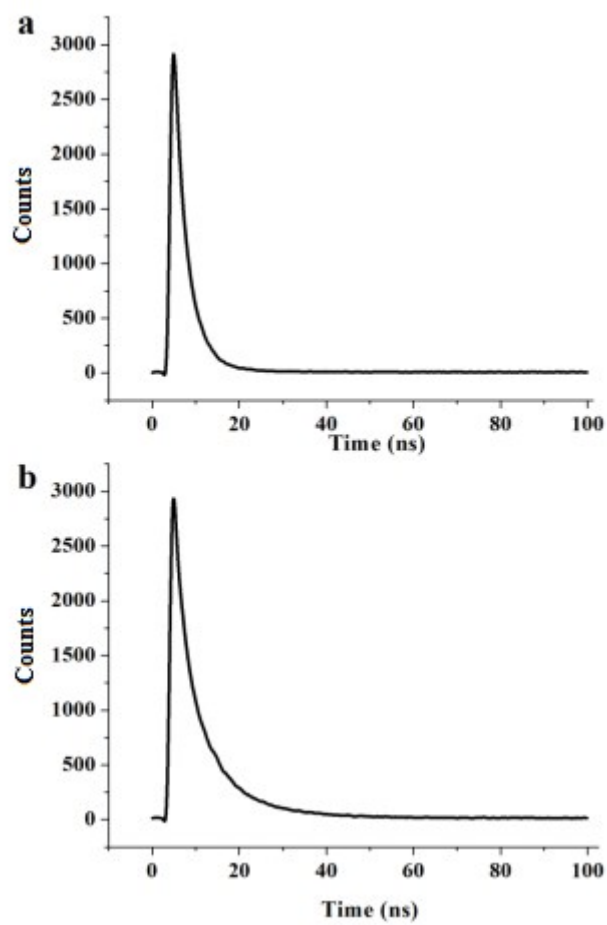

Fig. S2 Fluorescence decay profiles of as-prepared (a) and grinding (b)  $\text{BF}_2\text{-TP}$ ,  $\lambda_{\text{ex}} = 370$  nm.

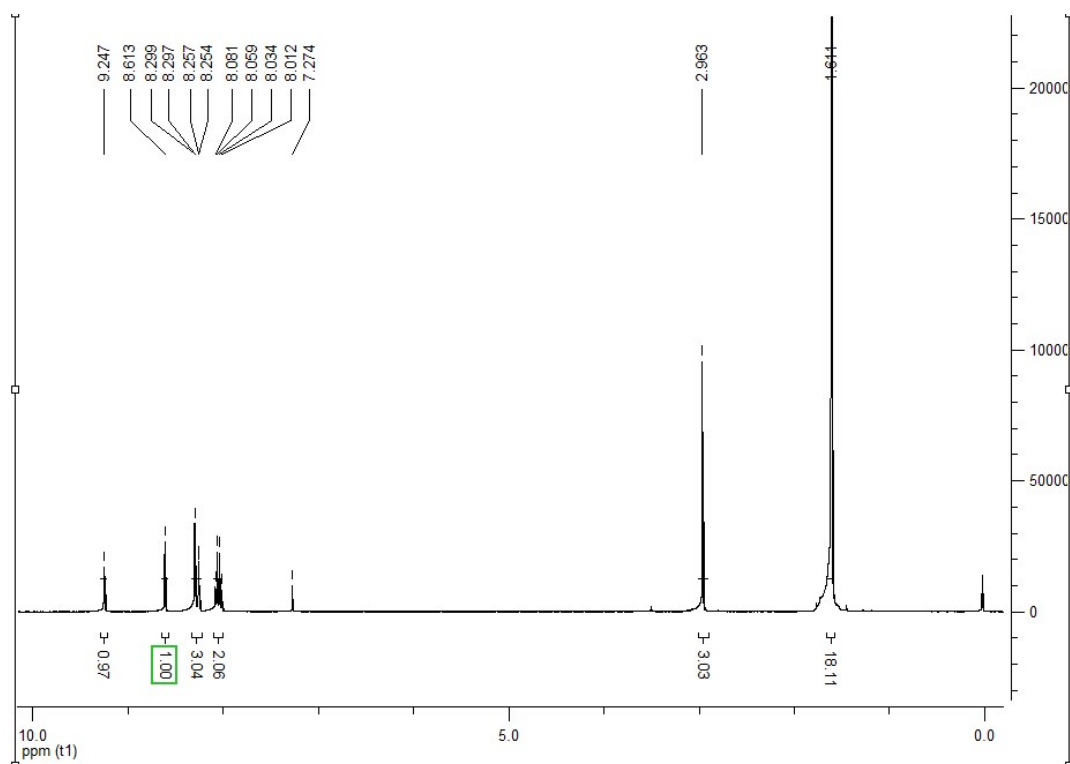

Fig. S3  $^1\text{H}$  NMR (400 MHz) spectrum of compound **6**.

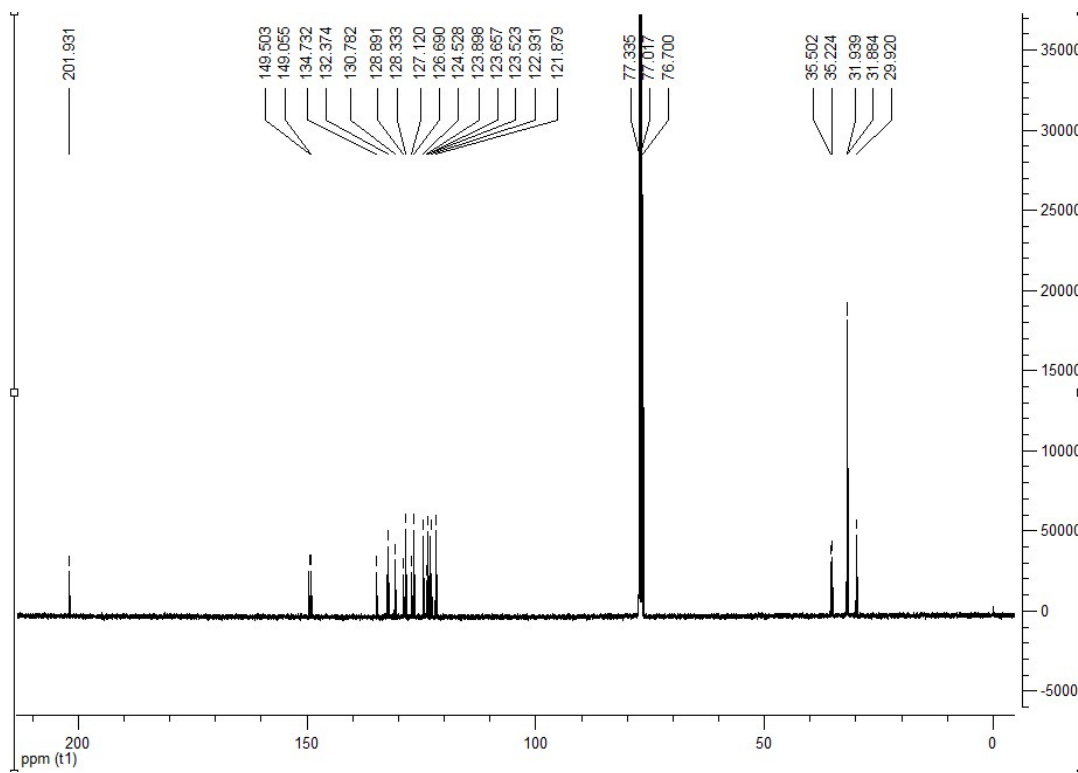

**Fig. S4**  $^{13}\text{C}$  NMR (100 MHz) spectrum of compound **6**.

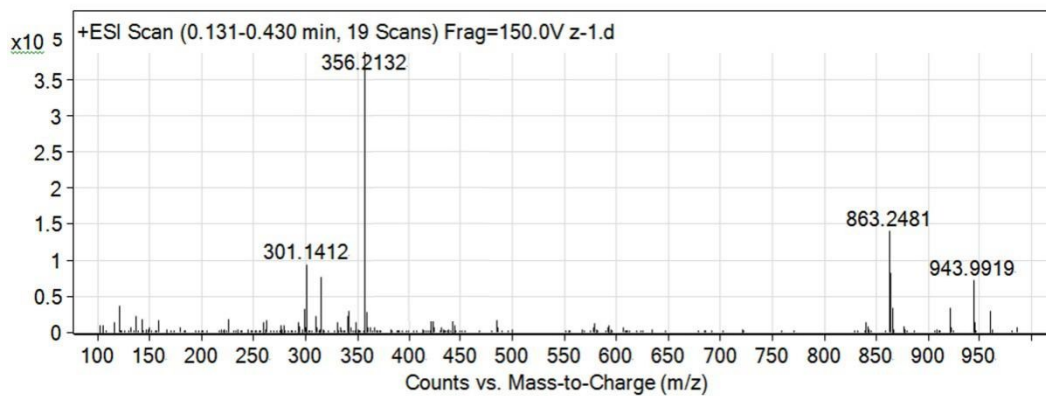

**Fig. S5** TOF LC/MS spectrum of compound **6**.

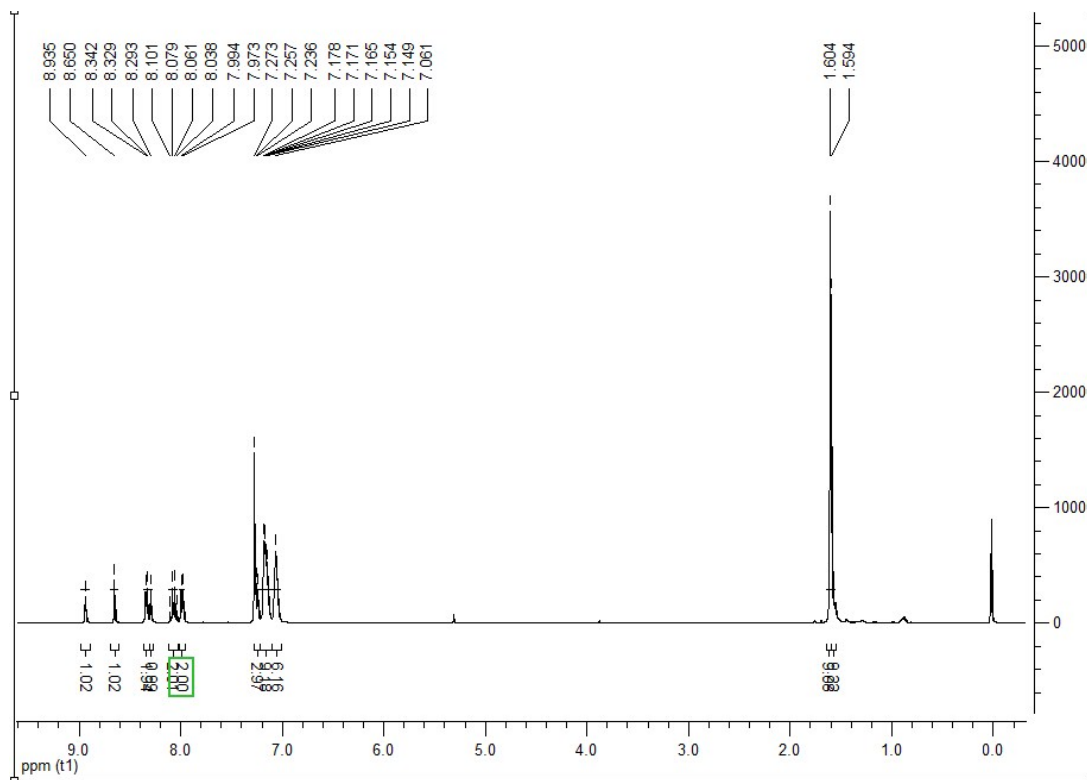

**Fig. S6**  $^1\text{H}$  NMR (400 MHz) spectrum of compound **BF<sub>2</sub>-TP**.



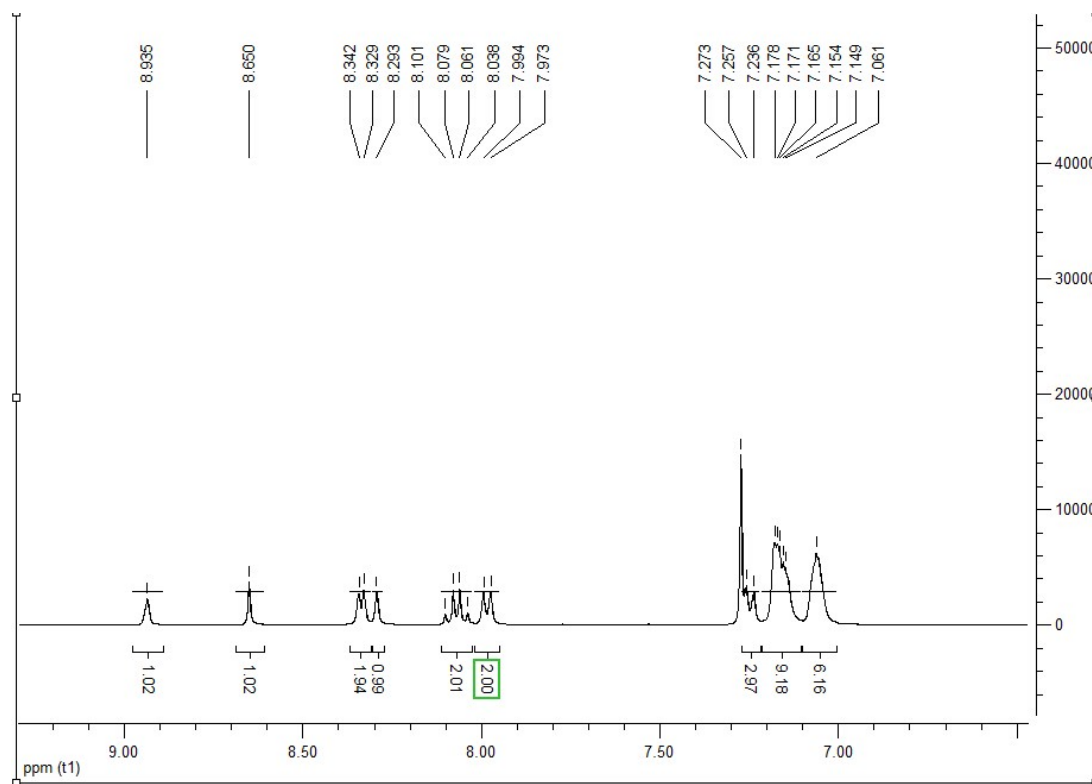

**Fig. S7**  $^1\text{H}$  NMR (400 MHz) spectrum (larger version) of compound  $\text{BF}_2\text{-TP}$ .

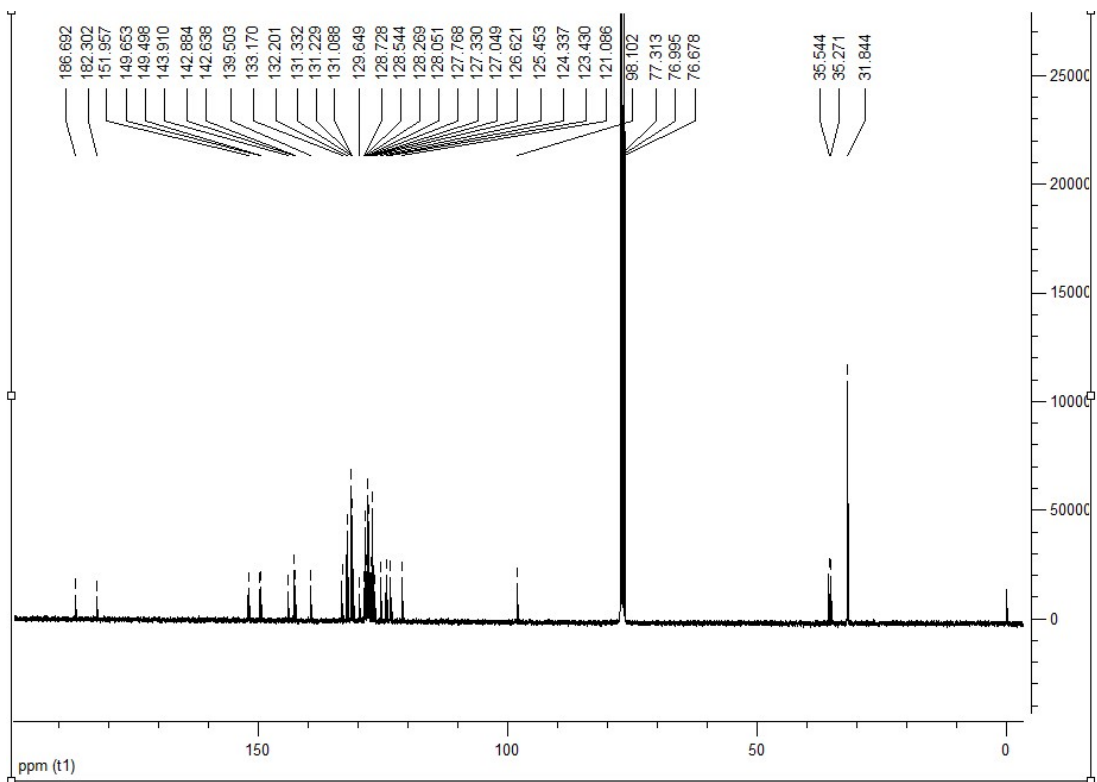

Fig. S8  $^{13}\text{C}$  NMR (100 MHz) spectrum of compound  $\text{BF}_2\text{-TP}$ .

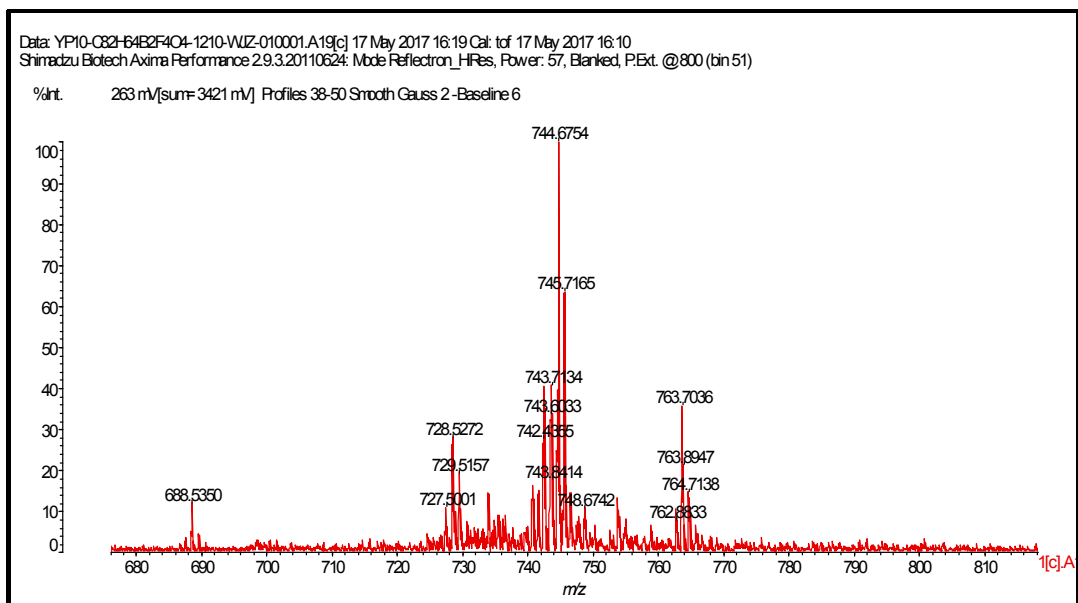

Fig. S9 MALDI/TOF MS spectrum of compound  $\text{BF}_2\text{-TP}$ .
